# Supplementary material for: The mannose receptor (CD206) identifies a population of colonic macrophages in health and inflammatory bowel disease
Source: PubMed Central journal article supplement (PMC8490356; doi:10.1038/s41598-021-98611-7), 2021-10-04
Supplement: 41598_2021_98611_MOESM1_ESM.pdf [file 41598_2021_98611_MOESM1_ESM.pdf]

**A**Gated live CD45<sup>+</sup>  
CD64<sup>+</sup> CD14<sup>+</sup>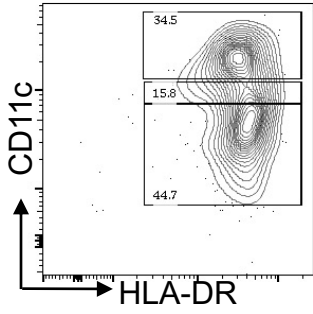**B**Gated live CD45<sup>+</sup>  
CD64<sup>+</sup> CD14<sup>+</sup>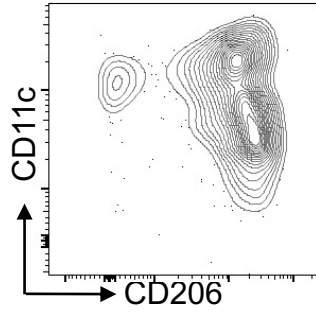**C**Gated live CD45<sup>+</sup>  
CD64<sup>+</sup> MHC II<sup>+</sup>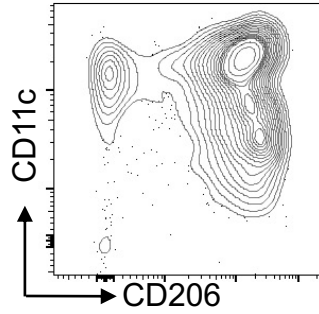

**Supplementary Figure 1.** Staining of CD45<sup>+</sup> CD64<sup>+</sup> CD14<sup>+</sup> cells and CD45<sup>+</sup> CD64<sup>+</sup> MHC II<sup>+</sup> cells to investigate the relationship between CD11c and CD206 staining.

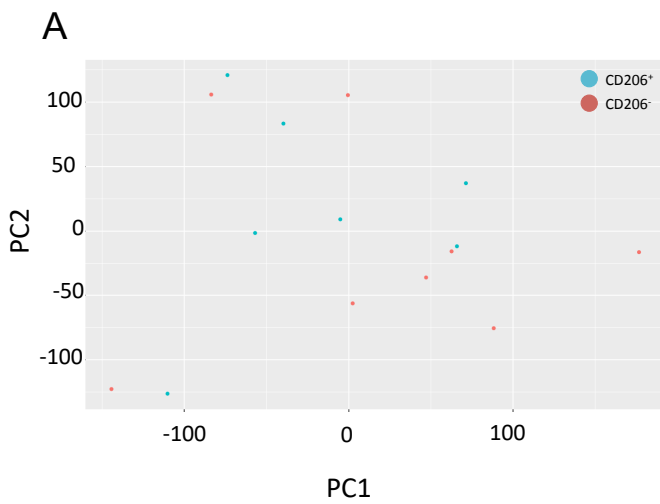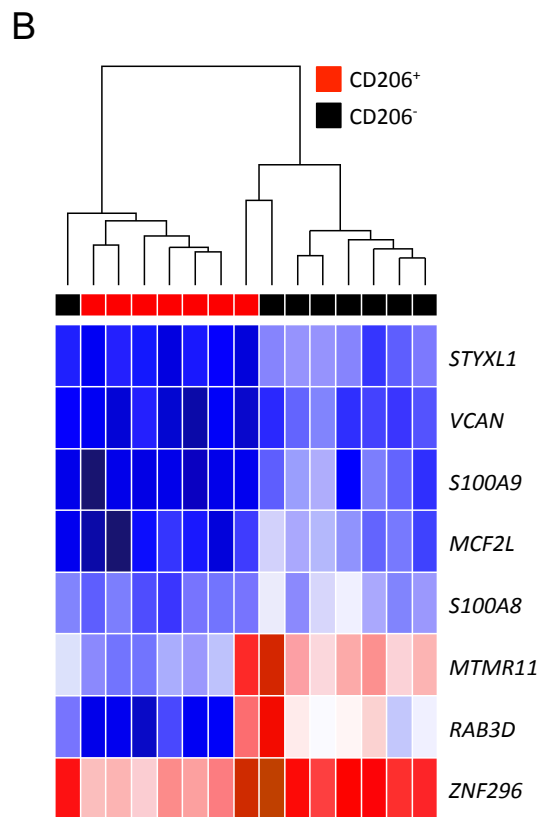

**Supplementary Figure 2.** RNAseq analysis of FACS-purified CD206<sup>-</sup> and CD206<sup>+</sup> colonic human macrophage populations. (A) Principal component analysis (PCA) comparing CD206<sup>+</sup> and CD206<sup>-</sup> intestinal macrophage populations. (B) Eight genes with statistically significant (adjusted P-value <0.05) differential expression between CD206<sup>-</sup> and CD206<sup>+</sup> macrophage populations.

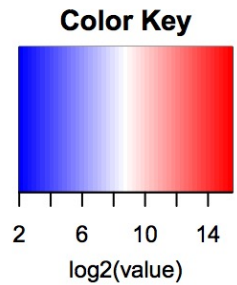

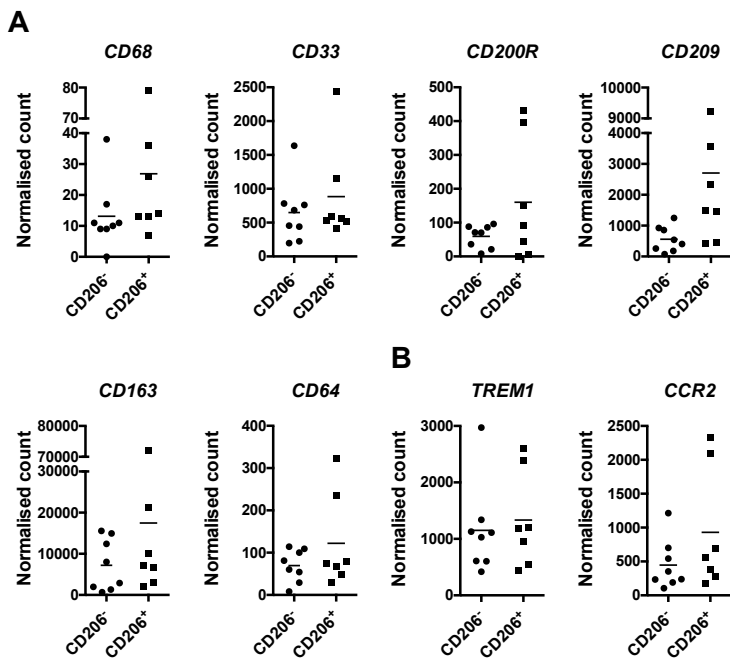

**Supplementary Figure 3.** RNAseq analysis of FACS-purified CD206<sup>-</sup> and CD206<sup>+</sup> colonic human macrophage populations. (A) Comparative expression of macrophage associated cell surface markers on CD206<sup>-</sup> and CD206<sup>+</sup> cells. (B) Comparative expression of monocyte-associated cell surface markers on CD206<sup>-</sup> and CD206<sup>+</sup> cells. Intestinal macrophages derived from healthy colon resections; n=8 and 7 for CD206<sup>-</sup> and CD206<sup>+</sup>, respectively.

A

Gated live CD45<sup>+</sup>HLA-DR<sup>+</sup>CD64<sup>+</sup>

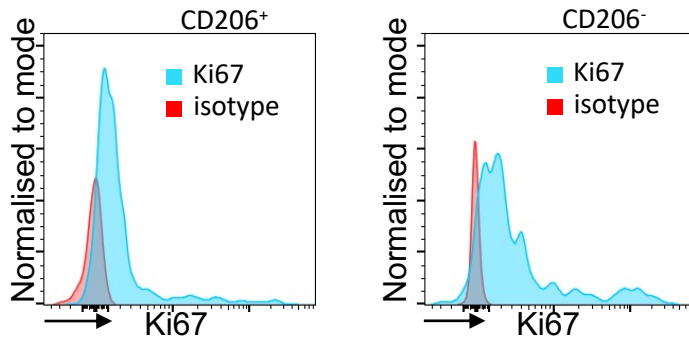

**Supplementary Figure 4.** Ki67 staining from CD206<sup>+</sup> and CD206<sup>-</sup> compared to their isotype control (red).
